# Supplementary material for: Cancer-associated noncoding mutations affect RNA G-quadruplex-mediated regulation of gene expression
Source: PubMed Central journal article supplement (PMC5429658; doi:10.1038/s41598-017-00739-y), 2017-04-06
Supplement: 41598_2017_739_MOESM2_ESM.pdf [file 41598_2017_739_MOESM2_ESM.pdf]

# **Cancer-associated noncoding mutations affect RNA G-quadruplex-mediated regulation of gene expression**

Mahdi Zeraati<sup>1,2</sup>, Aaron L. Moye<sup>3</sup>, Jason W. H. Wong<sup>4</sup>, Dilmi Perera<sup>4</sup>, Mark J. Cowley<sup>1,2</sup>, Daniel U. Christ<sup>1,2</sup>, Tracy M. Bryan<sup>3</sup>, Marcel E. Dinger<sup>1,2\*</sup>

<sup>1</sup> Garvan Institute of Medical Research, Sydney, NSW, 2010, Australia

<sup>2</sup> St Vincent's Clinical School, Faculty of Medicine, University of New South Wales, Sydney, NSW, 2052, Australia

<sup>3</sup> Children's Medical Research Institute, University of Sydney, Sydney, NSW, 2145, Australia

<sup>4</sup> Prince of Wales Clinical School, Faculty of Medicine, University of New South Wales, Sydney, NSW, 2052, Australia

**Supplementary Table 1. List of sequences**

**BCL2**

| Name                                                    | Sequence (5' → 3')                                                                                                                                                                                                                                                                                                                                                                                                                                                                                                                           |
|---------------------------------------------------------|----------------------------------------------------------------------------------------------------------------------------------------------------------------------------------------------------------------------------------------------------------------------------------------------------------------------------------------------------------------------------------------------------------------------------------------------------------------------------------------------------------------------------------------------|
| BCL2 5'UTR                                              | UUUCUGUGAAGCAGAAGUCUGGGAAUCGAUCUGGAAUCCUCCUAA<br>UUUUUACUCCUCUCCCGCGACUCCUGAUUCAUUGGGAAGUUUC<br>AAAUACAGCUAUAACUGGAGAGUGCUGAAGAUUGAUGGGAUCGUUG<br>CCUUAUGCAUUUUGUUUUGGUUUUACAAAAAGGAAACUUGACAGAGG<br>AUCAUGCUGUACUUAAAAAAUACAACAUCACAGAGGAAGUAGACUG<br>AUAUUAACAUAACUUAUUAUUAACGUGCCUCAUGAAUUAAGAU<br>CCGAAAGGAAUUGGAAUAAAAUUUCCUGCAUCUCAUGCCAAGGGG<br>GAAACACCAGAAUCAAGUGUCCGCGUGAUUGAAGACACCCCCUCG<br>UCCAAGAAUGCAAAGCACAUCCAUAUUAUAGCUGGAUUUAACUCC<br>UCUUCUUUCUCUGGGGGCCGUGGGGUGGAGCUGGGGGCGAGAGG<br>UGCCGUUGGCCCCCGUUGCUUUUCCUCUGGGAAGG |
| Fwd primer for deleting BCL2 G4                         | GCGAGAGGTGCCGTTGGC                                                                                                                                                                                                                                                                                                                                                                                                                                                                                                                           |
| Rev primer for deleting BCL2 G4                         | CCAGAGAAAGAAGAGGAGTTATAATCCAGC                                                                                                                                                                                                                                                                                                                                                                                                                                                                                                               |
| Fwd primer for mutating BCL2 G4                         | CGTGGGGTGGaAGCTGGGGCG                                                                                                                                                                                                                                                                                                                                                                                                                                                                                                                        |
| Rev primer for mutating BCL2 G4                         | GCCCCCAGAGAAAGAAGAGGAGTTATAATCC                                                                                                                                                                                                                                                                                                                                                                                                                                                                                                              |
| Wild type BCL2 RNA G4 for biophysical study             | r(GGGCCGUGGGGUGGAGCUGGG)                                                                                                                                                                                                                                                                                                                                                                                                                                                                                                                     |
| Mutated BCL2 RNA G4 for biophysical study               | r(GGGCCGUGGGGUGGAAGCUGGG)                                                                                                                                                                                                                                                                                                                                                                                                                                                                                                                    |
| Wild type <b>long</b> BCL2 RNA G4 for biophysical study | r(AACUCCUCUUCUUUCUCUGGGGGCCGUGGGGUGGAGCUGGGG<br>CGAGAGGUGCCGUUGGCC)                                                                                                                                                                                                                                                                                                                                                                                                                                                                          |
| Mutated <b>long</b> BCL2 RNA G4 for biophysical study   | r(AACUCCUCUUCUUUCUCUGGGGGCCGUGGGGUGGAAGCUGGGGC<br>GAGAGGUGCCGUUGGCC)                                                                                                                                                                                                                                                                                                                                                                                                                                                                         |
| Fwd primer for the RT-qPCR of firefly                   | CTGAGTACTTCGAAATGTCCGTTCCG                                                                                                                                                                                                                                                                                                                                                                                                                                                                                                                   |
| Rev primer for the RT-qPCR of firefly                   | CTCCGATAAATAACGCGCCCAACACC                                                                                                                                                                                                                                                                                                                                                                                                                                                                                                                   |
| Fwd primer for the RT-qPCR of renilla                   | GAGCCAGTAGCGCGGTGTATTATACC                                                                                                                                                                                                                                                                                                                                                                                                                                                                                                                   |
| Rev primer for the RT-qPCR of renilla                   | CCAAACAAGCACCCCAATCATGGC                                                                                                                                                                                                                                                                                                                                                                                                                                                                                                                     |
| Fwd primer for the RT-qPCR of GAPDH                     | GCTGAACGGGAAGCTCAC                                                                                                                                                                                                                                                                                                                                                                                                                                                                                                                           |
| Rev primer for the RT-qPCR of GAPDH                     | CCTCCGACGCCTGCTTC                                                                                                                                                                                                                                                                                                                                                                                                                                                                                                                            |

## CXCL14

| Name                                          | Sequence (5' → 3')                                                                                                                                                                                                                                                                                                                                                                                                                                                                                                                 |
|-----------------------------------------------|------------------------------------------------------------------------------------------------------------------------------------------------------------------------------------------------------------------------------------------------------------------------------------------------------------------------------------------------------------------------------------------------------------------------------------------------------------------------------------------------------------------------------------|
| CXCL14 5'UTR                                  | AAUGUGUGCGCGCUGUGGUAUGGGUGUGCAAGUGUGCGAAGGCG<br>GCGUGUUGUGUGAGCGAGAGGGUAGCGGAUGUGUGUGUGCGUGU<br>GCGCGCUGGGCUCGGGUGUGCGCCGUGCGAUAGCGGGUCCUU<br>UCCCGGGGC <sup>GG</sup> GCGACGGGCGGGCUGGGAAGGUCUCCUCCCCUC<br>ACCACAUUGAGAAAUCUCAGUGAGUCACCGAGUGGUUCUGCAUAAU<br>AAUGAGCUCGCUCGCUGCGAGGGCAGGAGCGGAUUUAAAAGAGGC<br>CAGGGCGGGCGGAGGGAGGCUGUGGAGAGAGCGCGGAGACAAGC<br>GCAGAGCGCAGCGCACGGCCACAGACAGCCUUGGGCAUCCACCGA<br>CGGCGCAGCCGGAGCCAGCAGAGCCGGAAGGCGCGCCCCGGGCAG<br>AGAAAGCCGAGCAGAGCUGGGUGGCGUCUCCGGGCGCCGCUCCG<br>ACGGGCCAGCGCCUCCCC |
| Fwd primer for deleting CXCL14 G4             | CGGGAAGGCCCCCCCCAC                                                                                                                                                                                                                                                                                                                                                                                                                                                                                                                 |
| Rev primer for deleting CXCL14 G4             | CGGGGGCCCGCTTCGCGC                                                                                                                                                                                                                                                                                                                                                                                                                                                                                                                 |
| Fwd primer for mutating CXCL14 G4             | CCCCCGGGG <sup>aa</sup> GCGACGGGCGG                                                                                                                                                                                                                                                                                                                                                                                                                                                                                                |
| Rev primer for mutating CXCL14 G4             | CCCGCTTCGCGCGGCGCC                                                                                                                                                                                                                                                                                                                                                                                                                                                                                                                 |
| Wild type CXCL14 RNA G4 for biophysical study | r(GGGC <sup>GG</sup> GCGACGGGCGGGCUGGG)                                                                                                                                                                                                                                                                                                                                                                                                                                                                                            |
| Mutated CXCL14 RNA G4 for biophysical study   | r(GGGC <sup>AA</sup> GCGACGGGCGGGCUGGG)                                                                                                                                                                                                                                                                                                                                                                                                                                                                                            |

## TAOK2

| Name                                         | Sequence (5' → 3')                                                                                                                                                                                                                                                                                                                                                                                                                                                                                                                                                                                                                                                                                                                                                                                                                                                                                                     |
|----------------------------------------------|------------------------------------------------------------------------------------------------------------------------------------------------------------------------------------------------------------------------------------------------------------------------------------------------------------------------------------------------------------------------------------------------------------------------------------------------------------------------------------------------------------------------------------------------------------------------------------------------------------------------------------------------------------------------------------------------------------------------------------------------------------------------------------------------------------------------------------------------------------------------------------------------------------------------|
| TAOK2 5'UTR                                  | UCUCCAUCUUGGAAUUGGGAGG <sup>A</sup> AGAGGGAGAGGGAGACCGGGAC<br>GAGACCGGGGUCUGUGGUGCGGAGAGAGGCUGAGACGGAGAAGAG<br>GAGAGGCAGAGAGGGCGCGGGGACCGUCAGCAGACCCUAGCUAC<br>AAUCGUUCAGCUAUUCUCGGAAGAGAGAAGGGAGAGGGAGGAGGC<br>CGGGGCGGGAGUGGGGGCUGUCACCCUCGGACCCCGGGUGAGA<br>GGGGCCGUGCGGCCGGACGUCCUCGGGGUGGGCCCCAGUCGGU<br>GGCCGAAGACCUACAGCUCAGGCCCCUUGGUCCAAAUUUCAGG<br>CUUUGCCCCUCCUCCUUCUCAGAUACCCGGGUAACAGUCCUCAUA<br>GUCCAGAUAUCCGGGACUCGGGUCCCAACCUCUCUAAACCUGGGU<br>CUCUGUUUCAUAGAAUUUCAAAUUCAGGUUCAGGCCCCUGCGUGC<br>ACCAGUAUCCGGGGUUCAUUCCCCGGGCGUUCAAAUUUCGGAUUC<br>AGUCUCCAUCCCGUUCAGAUUUCGGGGUUCAGACCCCAUAUCAG<br>AAUCCGGAAUUCGGCAGCUGUCGCCUCGACGAGGGGGAGGACU<br>GGACCGCGAGGUCAGAUUAGGUUGUCACCCCUCCCCUCCAGGGG<br>AGGCUUCCCGGGCCCCGCCUCAGGAAGGGCGAAAGCCGAGGAAG<br>AGGUGGCAAGGGGAAAGGUCUCCUUGCCCCUCUCCUGCUUGGCA<br>GAGCCGUGGAGGACCCAGGCGGAAGCGGAGGCGCUGGGGCAC<br>CAUAGUGACCCCUACCAGGCCAGGCCCCACUCUCAGGGCCCCCAG<br>GGCCACC |
| Fwd primer for deleting TAOK2 G4             | GACCGGACGAGACCGGG                                                                                                                                                                                                                                                                                                                                                                                                                                                                                                                                                                                                                                                                                                                                                                                                                                                                                                      |
| Rev primer for deleting TAOK2 G4             | AATTCCAAGATGGAGAGGTGGCC                                                                                                                                                                                                                                                                                                                                                                                                                                                                                                                                                                                                                                                                                                                                                                                                                                                                                                |
| Fwd primer for mutating TAOK2 G4             | AATTGGGAGG <sup>g</sup> AGAGGGAGAG                                                                                                                                                                                                                                                                                                                                                                                                                                                                                                                                                                                                                                                                                                                                                                                                                                                                                     |
| Rev primer for mutating TAOK2 G4             | CCAAGATGGAGAGGTGGC                                                                                                                                                                                                                                                                                                                                                                                                                                                                                                                                                                                                                                                                                                                                                                                                                                                                                                     |
| Wild type TAOK2 RNA G4 for biophysical study | r(GGGAGG <sup>A</sup> AGAGGGAGAGGGAGACCGGG)                                                                                                                                                                                                                                                                                                                                                                                                                                                                                                                                                                                                                                                                                                                                                                                                                                                                            |
| Mutated TAOK2 RNA G4 for biophysical study   | r(GGGAGG <sup>G</sup> AGAGGGAGAGGGAGACCGGG)                                                                                                                                                                                                                                                                                                                                                                                                                                                                                                                                                                                                                                                                                                                                                                                                                                                                            |

## Construction of T7 pGL3 plasmid and making templates for the in vitro transcription

| Name                                                                                        | Sequence (5' → 3')                  |
|---------------------------------------------------------------------------------------------|-------------------------------------|
| Fwd primer for colony PCR (RVprim3)                                                         | CTAGCAAAATAGGCTGTCCC                |
| Rev primer for colony PCR (GLprim2)                                                         | TGGAAGACGCCAAAAACATAAAG             |
| Fwd primer for cloning T7 promoter upstream of multiple cloning site (SmaI-T7-col pGL3 fwd) | actcactataggGTACCGAGCTCTTACGCG      |
| Rev primer for cloning T7 promoter upstream of multiple cloning site (SmaI-T7-col pGL3 rev) | cgtattaccgggTATCGATAGAGAAATGTTCTGGC |
| Fwd primer for PCR amplification of the 5'UTR plus luciferase fragments (pGL3 SmaI T7 fwd)  | CGATACCCGGGTAATACGACTCACTATAGGG     |
| Rev primer for PCR amplification of the 5'UTR plus luciferase fragments (pGL3 luc XbaI rev) | GACTCTAGAATTACACGGCGATCTTTCCG       |

**Supplementary Table 2. 5' UTR G4 destabilising mutations**

| Mutation details                 |              |         |                    | G4 sequence <sup>a</sup> (5' → 3') |                                                                  |                                                   | $\Delta G$ (kcal/mol) <sup>b</sup> |         |
|----------------------------------|--------------|---------|--------------------|------------------------------------|------------------------------------------------------------------|---------------------------------------------------|------------------------------------|---------|
| Mutation Coordinate <sup>c</sup> | Patient's ID | Gene    | Cancer             | Strand                             | Wild-type                                                        | Mutant                                            | Wild-type                          | Mutant  |
| C > T<br>chr15:50647428          | PD3989a      | GABPB1  | Breast             | -                                  | <u>GGGCCGGG</u> <u>G</u> <u>UCCGGGAGGG</u>                       | GGGCCGG <u>A</u> UCCGGGAGGG                       | -161.27                            | -150.30 |
| C > G<br>chr17:73511632          | PD7321a      | CASKIN2 | Breast             | -                                  | <u>GGGAGGG</u> <u>G</u> <u>AGGGGGGAGGG</u>                       | GGGAGG <u>C</u> AGGGGGGAGGG                       | -237.77                            | -231.89 |
| G > A<br>chr17:40834722          | DO45087      | CNTNAP1 | Liver              | +                                  | <u>GGGAGGGAA</u> <u>G</u> <u>GGUGGG</u>                          | GGGAGGGAA <u>A</u> GGUGGG                         | -76.99                             | -53.11  |
| C > T<br>chr8:28347804           | DO23534      | FBXO16  | Liver              | -                                  | <u>GGGAGGGGUGAGGGACUGGAG</u><br><u>GG</u>                        | <u>AGGAGGGGUGAGGGACUGGAG</u><br><u>GG</u>         | -29.64                             | -23.60  |
| C > A<br>chr3:42845880           | LUAD-5V8LT   | HIGD1A  | Lung               | -                                  | <u>GGGACUCGGGCCGCG</u> <u>G</u> <u>GGC</u> <u>GG</u><br><u>G</u> | GGGACUCGGGCCGCG <u>U</u> GGC<br>G                 | -101.87                            | -98.82  |
| C > A<br>chr4:75719847           | LUAD-5V8LT   | BTC     | Lung               | -                                  | <u>GGGUGUGGGUAUGGGUGUG</u> <u>G</u><br><u>GGCAAUUUGGG</u>        | <u>GGGUGUGGGUAUGGGUGUGU</u><br><u>GGCAAUUUGGG</u> | -155.85                            | -144.91 |
| G > T<br>chr6:53659864           | LUAD-5V8LT   | LRRC1   | Lung               | +                                  | <u>GGCGGGCGGGGUACAGGGAC</u><br><u>GGGGCAGGG</u>                  | <u>GGCGGGCGGGGUACAGGGAC</u><br><u>GUGGCAGGG</u>   | -158.65                            | -149.79 |
| C > A<br>chr8:144911228          | LUAD-S01302  | PUF60   | Lung               | -                                  | <u>GGGCGGGGCGGGGGCCUGGG</u>                                      | <u>UGGCGGGGCGGGGGCCUGGG</u>                       | -116.40                            | -111.10 |
| C > T<br>chr3:141944386          | DO27813      | GK5     | Malignant Lymphoma | -                                  | <u>GGGUUGGGGCCCG</u> <u>G</u> <u>GUUGGG</u>                      | GGGUUGGGGCCCG <u>A</u> GUUGGG                     | -58.80                             | -57.00  |

|                         |              |         |                    |   |                                            |                                      |         |         |
|-------------------------|--------------|---------|--------------------|---|--------------------------------------------|--------------------------------------|---------|---------|
| C > T<br>chr18:60985950 | DO27801      | BCL2    | Malignant Lymphoma | - | <u>GGGCCGUGGGGUGG</u> <b>G</b> AGCUGG<br>G | GGGCCGUGGGGUGG <b>A</b> AGCUGG<br>G  | 106.25  | 104.50  |
| G > C<br>chr22:23230078 | DO27851      | IGLL5   | Malignant Lymphoma | + | <u>GGGCCUGG</u> <b>G</b> CUAGGGACAGGG      | GGGCCUGG <b>C</b> CUAGGGACAGGG       | -159.95 | -157.30 |
| G > A<br>chr22:23230078 | DO27855      | IGLL5   | Malignant Lymphoma | + | <u>GGGCCUGG</u> <b>G</b> CUAGGGACAGGG      | GGGCCUGG <b>A</b> CUAGGGACAGGG       | -159.95 | -154.50 |
| C > T<br>chr7:56119187  | DO27827      | PSPH    | Malignant Lymphoma | - | <u>GGGCAGG</u> <b>G</b> CGUAGGGUGGG        | GGGCAGG <b>A</b> CGUAGGGUGGG         | -249.99 | -239.30 |
| G > A<br>chr3:45730840  | TCGA-DA-A3F3 | SACM1L  | Melanoma           | + | <u>GGGCGGGGAAAG</u> <b>G</b> GGUGGG        | GGGCGGGGAAAG <b>A</b> GGUGGG         | -94.48  | -73.69  |
| G > A<br>chr7:127233863 | TCGA-DA-A3F8 | FSCN3   | Melanoma           | + | <u>GGGG</u> <b>G</b> GGAGGGCUGGG           | GGGG <b>A</b> GGAGGGCUGGG            | -98.49  | -83.40  |
| G > A<br>chr8:22022672  | TCGA-DA-A3F8 | BMP1    | Melanoma           | + | <u>GGAGGGAGGGAGGGAG</u> <b>G</b> G         | <u>GGAGGGAGGGAGGGAG</u> <b>A</b> G   | -137.32 | -106.14 |
| G > A<br>chr20:43595130 | TCGA-EB-A24D | STK4    | Melanoma           | + | <u>GGGAGGGUCUCG</u> <b>G</b> GGGCGGG       | <u>AGGAGGGUCUCG</u> <b>G</b> GGGCGGG | -36.60  | -22.30  |
| G > A<br>chr7:99102730  | TCGA-EE-A29B | ZKSCAN5 | Melanoma           | + | <u>GGGUGGGCUG</u> <b>G</b> GACUCGGG        | GGGUGGGCUG <b>A</b> GACUCGGG         | -90.49  | -85.80  |
| C > T<br>chr2:75937669  | TCGA-EE-A2A0 | GCFC2   | Melanoma           | - | <u>GGGCGG</u> <b>G</b> AAGGGGCCGCGGG       | GGGCGG <b>A</b> AAGGGGCCGCGGG        | -111.50 | -100.80 |
| G > A<br>chr8:124194467 | TCGA-EE-A2GN | FAM83A  | Melanoma           | + | <u>GGGCAGGGAGGGGUG</u> <b>G</b> G          | GGGCAGGGAGGGGUG <b>A</b> G           | -646.42 | -633.90 |

|                          |                  |         |          |   |                                                   |                                                   |         |         |
|--------------------------|------------------|---------|----------|---|---------------------------------------------------|---------------------------------------------------|---------|---------|
| C > T<br>chr17:36955814  | TCGA-EE-<br>A2GN | PIP4K2B | Melanoma | - | <u>GGGUGGGAGGUAACGGGACGG</u><br><u>G</u>          | GGGUGG <u>A</u> AGGUAACGGGACGG<br>G               | -295.37 | -290.82 |
| C > T<br>chr12:111126954 | TCGA-EE-<br>A2M5 | HVCN1   | Melanoma | - | <u>GGGCGGGACGGGCUGGG</u>                          | GGGCG <u>A</u> GACGGGCUGGG                        | -82.32  | -67.10  |
| C > T<br>chr2:148778353  | TCGA-EE-<br>A3JI | ORC4    | Melanoma | - | <u>GGGCGGGAGAGGGGCGGGGUG</u><br><u>GG</u>         | GGGCGG <u>A</u> AGAGGGGCGGGGUG<br><u>GG</u>       | -95.47  | -85.74  |
| C > T<br>chr15:86338177  | TCGA-ER-<br>A19E | KLHL25  | Melanoma | - | <u>GGGCCGGGAGGCCGGGCGGG</u>                       | GGGCCGG <u>A</u> AGGCCGGGCGGG                     | -102.20 | -99.40  |
| G > A<br>chr10:31608106  | TCGA-FS-<br>A1ZD | ZEB1    | Melanoma | + | <u>GGGGGGGAAGGGGGAGGG</u>                         | GGGGG <u>A</u> GAAGGGGGAGGG                       | -42.37  | -24.37  |
| C > T<br>chr5:95297622   | TCGA-FS-<br>A1ZK | ELL2    | Melanoma | - | <u>GGGGCGGGGCGGGGCGGGA</u><br><u>GGGUGGGGCGGG</u> | <u>GAGGCGGGGCGGGGCGGGA</u><br><u>GGGUGGGGCGGG</u> | -176.83 | -171.70 |
| C > A<br>chr20:48729710  | TCGA-GN-<br>A262 | UBE2V1  | Melanoma | - | <u>GGCCGGGGACGGGUAAGGG</u><br><u>GGG</u>          | GGCCGGGGACGGGUAAG <u>UGG</u><br>GGG               | -122.17 | -110.62 |
| C > T<br>chr4:89079865   | TCGA-GN-<br>A266 | ABCG2   | Melanoma | - | <u>GGUUGGGGAAGG</u>                               | GGUUGGGG <u>A</u> AAGG                            | -177.02 | -175.30 |
| C > T<br>chr5:134914827  | TCGA-GN-<br>A26C | CXCL14  | Melanoma | - | <u>GGGCGGGCGACGGGCGGGCUG</u><br><u>GG</u>         | GGGC <u>A</u> GGCGACGGGCGGGCUG<br>GG              | -199.06 | -189.89 |
| C > T<br>chr5:134914828  | TCGA-GN-<br>A26C | CXCL14  | Melanoma | - | <u>GGGCGGGCGACGGGCGGGCUG</u><br><u>GG</u>         | GGGCG <u>A</u> GCGACGGGCGGGCUG<br>GG              | -199.06 | -188.49 |
| C > T<br>chr17:78194181  | TCGA-GN-<br>A26C | SGSH    | Melanoma | - | <u>GGGGUCGGGGCAGGGGGCGGG</u><br><u>G</u>          | GGGGUCGGGGCAGG <u>A</u> GGCGGG<br>G               | -56.57  | -36.20  |

|                         |         |        |         |   |                                                                                  |                                                                                                    |         |         |
|-------------------------|---------|--------|---------|---|----------------------------------------------------------------------------------|----------------------------------------------------------------------------------------------------|---------|---------|
| C > A<br>chr10:27529738 | DO46478 | ACBD5  | Ovarian | - | <u>GGGCGGGG</u> CUGUGGGGAGG <u>G</u> C<br>ACGGACUGACAGACGGACUCCG<br>GCGGAAUGGGGG | GGGCGGGG <u>C</u> UGUGGGGAGG <u>U</u> C<br>ACGGACUGACAGACGGACUCCG<br><u>G</u> C <u>G</u> GAAUGGGGG | -97.30  | -87.92  |
| G > T<br>chr19:34663401 | DO46342 | LSM14A | Ovarian | + | <u>GGGCGGG</u> AGGCUGG <u>G</u> GGAGGG                                           | GGGCGGGAGGCUGG <u>U</u> GGAGGG                                                                     | -112.95 | -109.29 |

<sup>a</sup> RNA G4 sequence is predicted by RNAfold in the context of the full-length 5' UTR. Underlined G shows a guanine involved in the G-tetrad formation. Mutated nucleotide is depicted in red.

<sup>b</sup>  $\Delta G$  (minimum free energy) is calculated by RNAfold for the entire 5' UTR.

<sup>c</sup> Coordinates are based on genomic reference sequence.



**Supplementary Table 3. 5' UTR G4 stabilising mutations**

| Mutation details                 |                      |         |        | G4 sequence <sup>a</sup> (5' → 3') |                                                      |                                                      | $\Delta G$ (kcal/mol) <sup>b</sup> |         |
|----------------------------------|----------------------|---------|--------|------------------------------------|------------------------------------------------------|------------------------------------------------------|------------------------------------|---------|
| Mutation Coordinate <sup>c</sup> | Patient's ID         | Gene    | Cancer | Strand                             | Wild-type                                            | Mutant                                               | Wild-type                          | Mutant  |
| G > C<br>chr10:115613904         | PD5935a              | DCLRE1A | Breast | -                                  | <u>GGUGGGGGG</u> <b>C</b> GG                         | <u>GGUGGGGGG</u> <b>G</b> GG                         | -245.19                            | -253.50 |
| T > G<br>chr1:236687199          | PD5956a              | LGALS8  | Breast | +                                  | <u>GGGCGCGGGGAGGG</u> <b>U</b> GGGG                  | <u>GGGCGCGGGGAGGG</u> <b>G</b> GGGG                  | -153.87                            | -158.90 |
| A > G<br>chr16:29985210          | TCGA-A6-6781_strelka | TAOK2   | Colon  | +                                  | <u>GGGAGGA</u> <b>A</b> AGAGGGAGAGGG<br>AGACCGGG     | <u>GGGAGG</u> <b>G</b> AGAGGGAGAGGG<br>AGACCGGG      | -335.29                            | -344.98 |
| A > C<br>chr5:157002814          | LUAD-S01356          | ADAM19  | Lung   | -                                  | <u>GGGCU</u> <u>GGGAGCCGGG</u> <b>U</b> GGG<br>GAGG  | <u>GGGCU</u> <u>GGGAGCCGGG</u> <b>G</b> GGG<br>GAGG  | -63.79                             | -66.00  |
| A > C<br>chr1:205782071          | LUAD-S01404          | SCL41A1 | Lung   | -                                  | <u>GGGGG</u> <b>U</b> GU <u>GGGGGG</u> CACG<br>CCGGG | <u>GGGGG</u> <b>G</b> GU <u>GGGGGG</u> CACG<br>CCGGG | -312.35                            | -335.80 |
| A > G<br>chr21:34775413          | LUAD-S01404          | IFNGR2  | Lung   | +                                  | <u>GGGGGGGUCAGG</u> <b>A</b> GGGGUG<br>GG            | <u>GGGGGGGUCAGG</u> <b>G</b> GGGGUG<br>GG            | -359.80                            | -373.37 |
| A > C<br>chr12:100378070         | LUAD-S01405          | ANKS1B  | Lung   | -                                  | <b>U</b> GGGGAGGAGG                                  | <b>G</b> GGGGAGGAGG                                  | -184.40                            | -187.50 |
| A > G<br>chr17:55333994          | LUAD-S01405          | MSI2    | Lung   | +                                  | <u>GGGCGGGGGGGAGG</u> <b>A</b> GG                    | <u>GGGCGGGGGGGAGG</u> <b>G</b> GG                    | -135.20                            | -154.30 |
| T > G<br>chr20:58179659          | LUAD-S01405          | PHACTR3 | Lung   | +                                  | <u>GGGGG</u> <u>UGGGGGG</u> <b>U</b> GGGGU<br>GGGGGG | <u>GGGGG</u> <u>UGGGGGG</u> <b>G</b> GGGGU<br>GGGGGG | -157.02                            | -183.20 |

|                         |                  |         |            |   |                                                   |                                                |         |         |
|-------------------------|------------------|---------|------------|---|---------------------------------------------------|------------------------------------------------|---------|---------|
| T > G<br>chr20:58179659 | DO32904          | PHACTR3 | Pancreatic | + | <u>GGGGGUGGGGGGUGGGGU</u><br><u>GGGGGG</u>        | <u>GGGGGUGGGGGGGGGGGU</u><br><u>GGGGGG</u>     | -157.02 | -183.20 |
| T > G<br>chr20:58179664 | DO46372          | PHACTR3 | Ovarian    | + | <u>GGGGGUGGGGGGUGGGGU</u><br><u>GGGGGG</u>        | <u>GGGGGUGGGGGGUGGGGG</u><br><u>GGGGGG</u>     | -157.02 | -174.89 |
| G > C<br>chr22:28197074 | LUAD-<br>S01405  | MN1     | Lung       | - | <u>GGGGCGGGGGGAGGG</u>                            | <u>GGGGGGGGGGGAGGG</u>                         | -443.10 | -452.00 |
| T > G<br>chr2:73144960  | LUAD-<br>S01405  | EMX1    | Lung       | + | <u>GGCGGGGGAGGUGAGGGGU</u><br><u>GCGGGCGGG</u>    | <u>GGCGGGGGAGGGGAGGGGU</u><br><u>GCGGGCGGG</u> | -214.20 | -215.27 |
| T > G<br>chr1:110453297 | TCGA-GN-<br>A266 | CSF1    | Melanoma   | + | <u>GGGU</u> <u>GGGGGAGGGGAGGCG</u><br><u>GGGG</u> | <u>GGGGGGGGGAGGGGAGGCG</u><br><u>GGGG</u>      | -191.40 | -192.27 |
| T > G<br>chr1:1260171   | DO46342          | CPTP    | Ovarian    | + | <u>GGGGCGGU</u> <u>GGGCGGGGACG</u><br><u>GGG</u>  | <u>GGGGCGGGGGGCGGGGACG</u><br><u>GGG</u>       | -199.17 | -209.34 |
| T > G<br>chr1:53527802  | DO46493          | PODN    | Ovarian    | + | <u>GGGGCGGGUGGGGAGUGGG</u><br><u>GGAAGGGGG</u>    | <u>GGGGCGGGGGGGGAGUGGG</u><br><u>GGAAGGGGG</u> | -83.54  | -85.09  |
| A > C<br>chr19:45873690 | DO46376          | ERCC2   | Ovarian    | - | <u>GGGGCGAGGGGAGGGUGAA</u><br><u>GGGGUGGG</u>     | <u>GGGGCGAGGGGAGGGGAA</u><br><u>GGGGUGGG</u>   | -187.88 | -208.08 |
| A > C<br>chr19:47164380 | DO46329          | DACT3   | Ovarian    | - | <u>GGGGCGGGGAGGUGGGACC</u><br><u>GGGAGAGGGG</u>   | <u>GGGGCGGGGAGGGGGACC</u><br><u>GGGAGAGGGG</u> | -41.25  | -51.03  |
| T > G<br>chr2:120770648 | DO46372          | EPB41L5 | Ovarian    | + | <u>GGGCGGAGGUCGGG</u>                             | <u>GGGCGGAGGGCGGG</u>                          | -83.72  | -110.50 |
| A > C<br>chr7:123389082 | DO46380          | WASL    | Ovarian    | - | <u>GGUUGGGGGAGG</u>                               | <u>GGUGGGGGAGG</u>                             | -143.99 | -152.30 |

|                         |         |        |         |   |                                                                |                                                                |        |         |
|-------------------------|---------|--------|---------|---|----------------------------------------------------------------|----------------------------------------------------------------|--------|---------|
| T > G<br>chr9:135458144 | DO46493 | BARHL1 | Ovarian | + | <u>GGGGUUGGGGG</u> <u>U</u> <u>GGGU</u> <u>GG</u><br><u>GG</u> | <u>GGGGUUGGGGG</u> <u>G</u> <u>GGGU</u> <u>GG</u><br><u>GG</u> | -83.07 | -107.49 |
|-------------------------|---------|--------|---------|---|----------------------------------------------------------------|----------------------------------------------------------------|--------|---------|

<sup>a</sup> RNA G4 sequence is predicted by RNAfold in the context of the full-length 5' UTR. Underlined G shows a guanine involved in the G-tetrad formation. Mutated nucleotide is depicted in red.

<sup>b</sup>  $\Delta G$  (minimum free energy) is calculated by RNAfold for the entire 5' UTR.

<sup>c</sup> Coordinates are based on genomic reference sequence.

**Supplementary Table 4.** The most stable RNA G4 predicted by RNAfold and QGRS-Mapper in the 5'UTR of BCL2, CXCL14 and TAOK2

**BCL2**

| RNAfold                                        |                          |                                                         |                          |
|------------------------------------------------|--------------------------|---------------------------------------------------------|--------------------------|
| Wild-type                                      |                          | Mutant                                                  |                          |
| G4 sequence <sup>a</sup>                       | $\Delta G$<br>(kcal/mol) | G4 sequence                                             | $\Delta G$<br>(kcal/mol) |
| <u>GGGCCGUGGGGUGG</u> <u>G</u> AGCU <u>GGG</u> | -11.05                   | GGGCCGUGGGGUGG <u>A</u> AGCU <u>GGG</u>                 | -1.20                    |
| QGRS-Mapper                                    |                          |                                                         |                          |
| Wild-type                                      |                          | Mutant                                                  |                          |
| G4 sequence                                    | G-score                  | G4 sequence                                             | G-score                  |
| <u>GGGCCGUGGGGUGG</u> <u>G</u> AGCU <u>GGG</u> | 40                       | <u>GGGCCGUGGGGUGG</u> <u>G</u> <u>A</u> AGCU <u>GGG</u> | 19                       |

<sup>a</sup> Underlined G shows a guanine involved in the G-tetrad formation predicted by each software. Mutated nucleotide is depicted in red.

**CXCL14**

| RNAfold                                                 |                          |                                                         |                          |
|---------------------------------------------------------|--------------------------|---------------------------------------------------------|--------------------------|
| Wild-type                                               |                          | Mutant                                                  |                          |
| G4 sequence <sup>a</sup>                                | $\Delta G$<br>(kcal/mol) | G4 sequence                                             | $\Delta G$<br>(kcal/mol) |
| <u>GGGC</u> <u>GG</u> GCGAC <u>GGGC</u> <u>GGC</u> UGGG | -19.37                   | <u>GGGC</u> <u>AA</u> GCGAC <u>GGGC</u> <u>GGC</u> UGGG | -9.64                    |
| QGRS-Mapper                                             |                          |                                                         |                          |
| Wild-type                                               |                          | Mutant                                                  |                          |
| G4 sequence                                             | G-score                  | G4 sequence                                             | G-score                  |
| <u>GGGC</u> <u>GG</u> GCGAC <u>GGGC</u> <u>GGC</u> UGGG | 39                       | <u>GGGC</u> <u>AA</u> GCGAC <u>GGGC</u> <u>GGC</u> UGGG | 35                       |

<sup>a</sup> Underlined G shows a guanine involved in the G-tetrad formation predicted by each software. Mutated nucleotide is depicted in red.

**TAOK2**

| <b>RNAfold</b>                                     |                          |                                                    |                          |
|----------------------------------------------------|--------------------------|----------------------------------------------------|--------------------------|
| Wild-type                                          |                          | Mutant                                             |                          |
| G4 sequence <sup>a</sup>                           | $\Delta G$<br>(kcal/mol) | G4 sequence                                        | $\Delta G$<br>(kcal/mol) |
| <u>GGGAGG</u> <u>A</u> <u>AGAGGGAGAGGGAGACCGGG</u> | -5.23                    | <u>GGGAGG</u> <u>G</u> <u>AGAGGGAGAGGGAGACCGGG</u> | -16.69                   |
| <b>QGRS-Mapper</b>                                 |                          |                                                    |                          |
| Wild-type                                          |                          | Mutant                                             |                          |
| G4 sequence                                        | G-score                  | G4 sequence                                        | G-score                  |
| <u>GGGAGG</u> <u>A</u> <u>AGAGGGAGAGGGAGACCGGG</u> | 38                       | <u>GGGAGG</u> <u>G</u> <u>AGAGGGAGAGGGAGACCGGG</u> | 40                       |

<sup>a</sup> Underlined G shows a guanine involved in the G-tetrad formation predicted by each software. Mutated nucleotide is depicted in red.

**BCL2**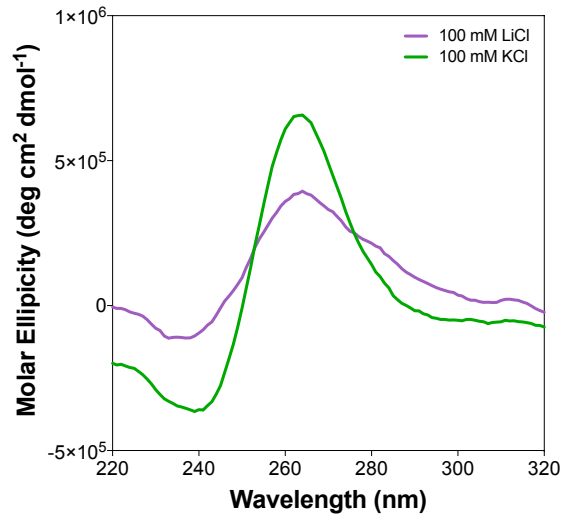**CXCL14**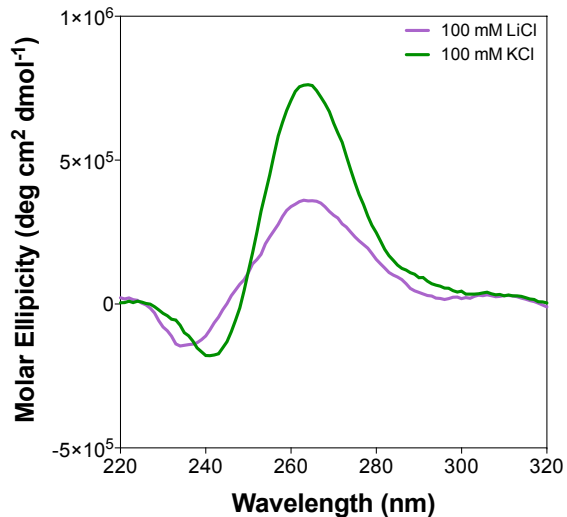**TAOK2**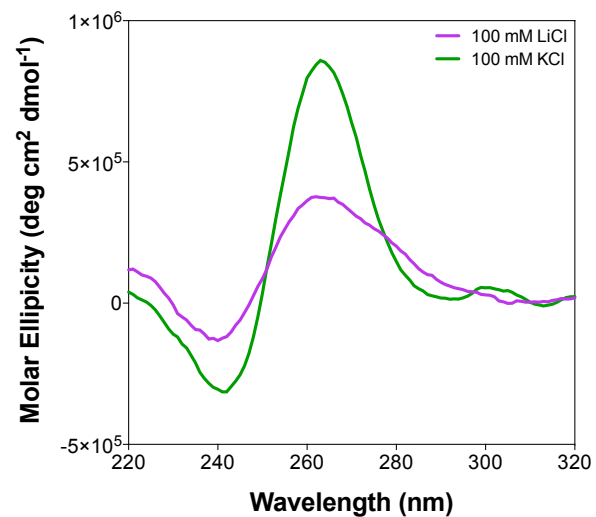

**Supplementary Figure 1.** CD spectra of *BCL2*, *CXCL14* and *TAOK2* wild-type G4 RNA oligos in 100 mM KCl or 100 mM LiCl ( $n \geq 2$ ).
